# Supplementary material
Source: ML conference proceedings conference paper supplement (https://www.ecva.net/papers/eccv_2020/papers_ECCV/html/123520426_ECCV_2020_paper.php)

# Softmax

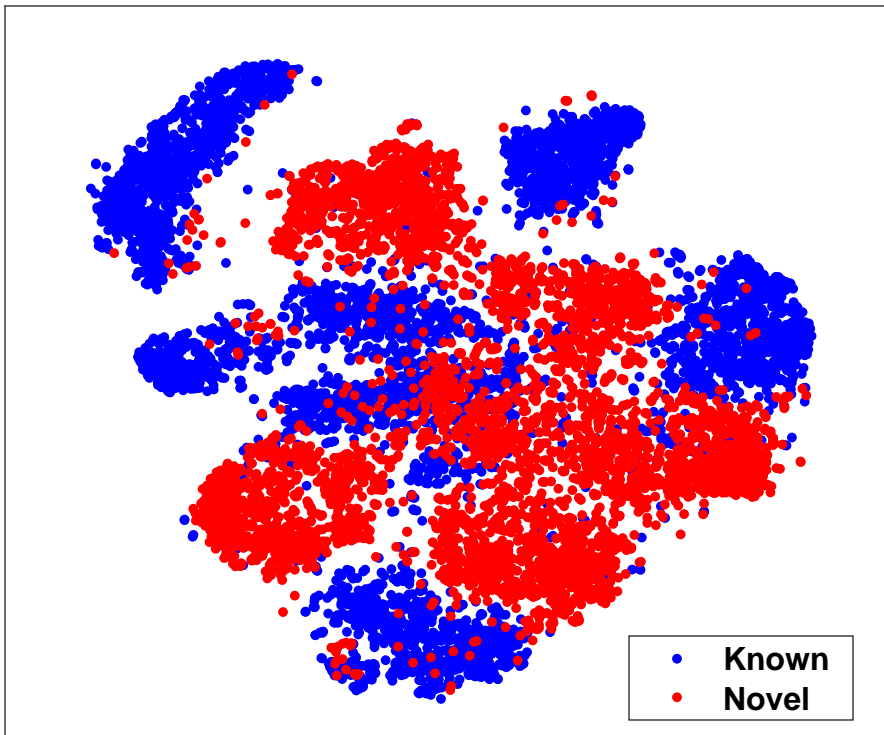

Supplement: Supplementary file 1 [file 123520426-supp.zip]

# Proposed

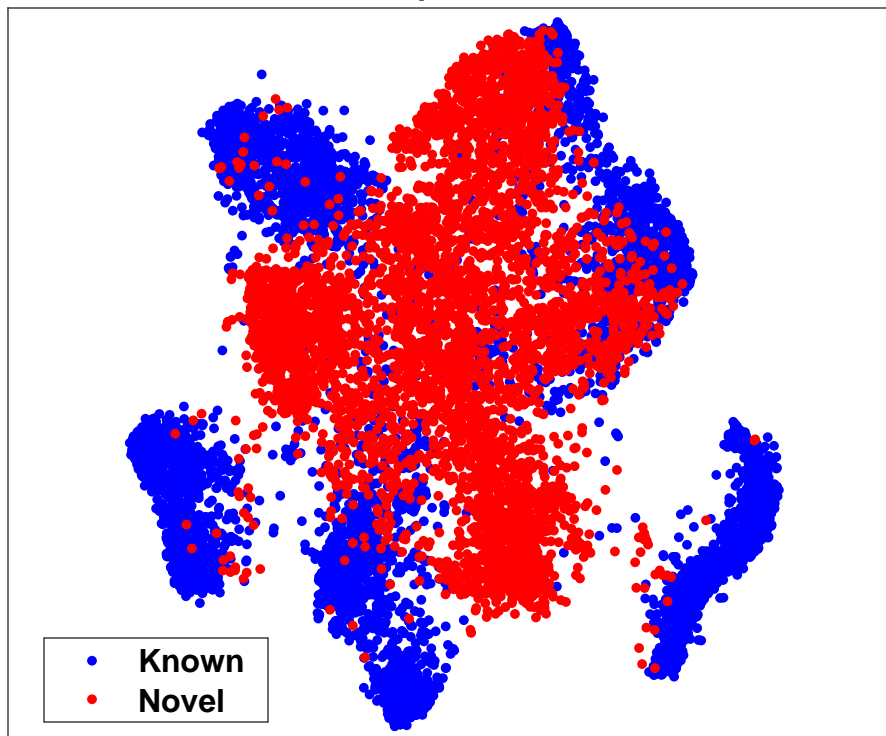

Supplement: Supplementary file 2 [file 123520426-supp.zip]

# ALOCC

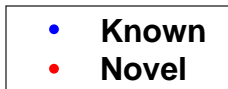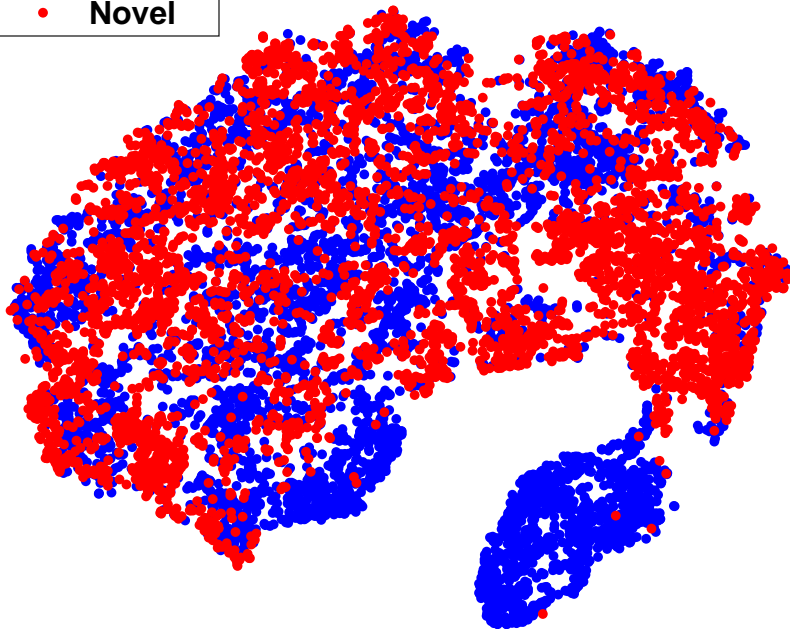

Supplement: Supplementary file 3 [file 123520426-supp.zip]

# ALOCC+GRL

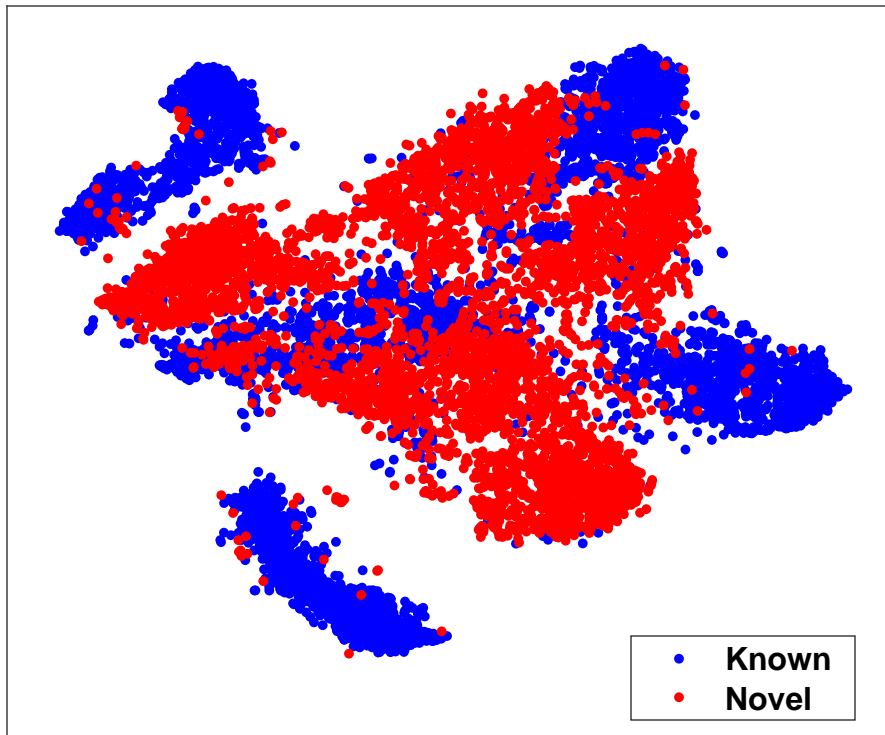

Supplement: Supplementary file 4 [file 123520426-supp.zip]

# GRL

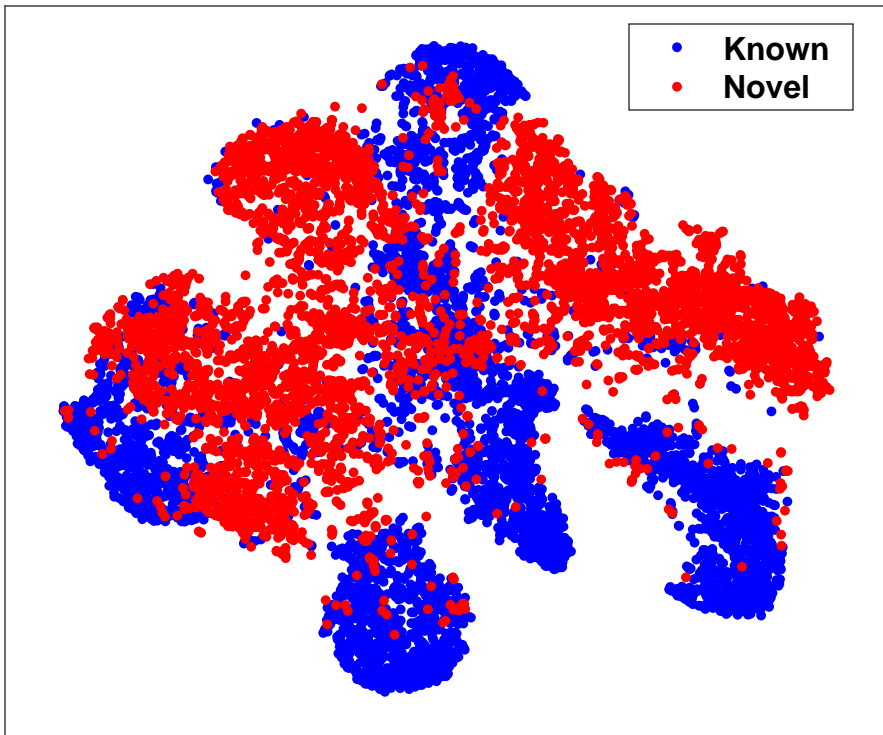

Supplement: Supplementary file 5 [file 123520426-supp.zip]
